# Supplementary material for: Frontotemporal dementia subtypes based on behavioral inhibition deficits
Source: PubMed Central journal article supplement — Alzheimers Dement (Amst). 2021 Apr 6;13(1):e12178. doi: 10.1002/dad2.12178 (PMC8022767; doi:10.1002/dad2.12178), 2021-04-06
Supplement: DAD2-13-e12178-s001.pdf [file DAD2-13-e12178-s001.pdf]

### Demographical and clinical characterisation of subjects<sup>1</sup>

|                                      | bvFTD (n=15) | HC (n=15)  | p-value           |
|--------------------------------------|--------------|------------|-------------------|
| Women/Men                            | 5/10         | 9 /6       | n.s. <sup>a</sup> |
| Age                                  | 63.8 (8.6)   | 63.7 (7.0) | n.s. <sup>b</sup> |
| Years since 1 <sup>st</sup> symptoms | 4.3 (2.3)    | -          | -                 |
| Education level                      | 6.6 (1.8)    | 7.2 (1.1)  | n.s. <sup>b</sup> |
| MMSE (/30)                           | 23.3 (2.5)   | 29.3 (0.8) | ***b              |
| FAB (/18)                            | 12.1 (3.4)   | 17.3 (0.9) | ***b              |
| Hayling errors score (/42)           | 20.3 (15.0)  | 2.4 (2.1)  | ***b              |
| Mini-SEA faux pas (/15)              | 8.2 (3.6)    | 13.4 (1.1) | ***c              |
| Mini-SEA recognition (/15)           | 8.8 (2.2)    | 12.8 (0.9) | ***c              |
| Mini-SEA (/30)                       | 17.0 (4.6)   | 26.2 (1.3) | ***c              |
| DAS (/72)                            | 30.5 (11.1)  | 20.3 (8.4) | **d               |
| HAD-A (/21)                          | 8 (4.9)      | 4.5 (2.4)  | *c                |
| HAD-D (/21)                          | 5.9 (3.6)    | 1.2 (0.9)  | ***b              |
| HAD (/42)                            | 13.9 (8.0)   | 5.7 (2.8)  | **d               |

<sup>1</sup>Data are given as Mean (SD).

<sup>a</sup> Chi-square test; <sup>b</sup> Wilcoxon test; <sup>c</sup> Aspin Welch test; <sup>d</sup> Student t-test

ns: non-significant; \*p<0.05; \*\*p<0.01; \*\*\*p<0.001

bvFTD: behavioural variant of Frontotemporal Dementia; DAS: Dimensional Apathy Scale;

FAB: Frontal Assessment Battery; HAD: Hospital Anxiety and Depression (-A Anxiety; -D

Depression); Hayling errors score: total errors score on the Hayling Test; Mini-SEA: Mini-

Social & Emotional Assessment; MMSE: Mini-Mental State Examination.
