# Supplementary material for: Frontotemporal dementia subtypes based on behavioral inhibition deficits
Source: PubMed Central journal article supplement — Alzheimers Dement (Amst). 2021 Apr 6;13(1):e12178. doi: 10.1002/dad2.12178 (PMC8022767; doi:10.1002/dad2.12178), 2021-04-06
Supplement: DAD2-13-e12178-s002.pdf [file DAD2-13-e12178-s002.pdf]

**List of MNI coordinates of local maximum grey matter atrophy in frontal, temporal, insular and subcortical regions for each subgroup of bvFTD patients**

| Regions for each subgroup | Hemisphere | MNI coordinates |     |     | T score |
|---------------------------|------------|-----------------|-----|-----|---------|
|                           |            | x               | y   | z   |         |
| <b>bvFTD-G0</b>           |            |                 |     |     |         |
| Medial Frontal gyrus      | L          | -9              | 58  | -2  | 8.58    |
| Middle Frontal gyrus      | R          | 28              | 38  | 34  | 6.71    |
| Medial Frontal gyrus      | L          | -11             | 20  | -21 | 6.05    |
| Middle Frontal gyrus      | L          | -43             | 36  | 27  | 6.02    |
| Superior Frontal gyrus    | L          | -17             | 64  | -8  | 4.92    |
| Anterior Cingulate gyrus  | R          | 5               | 28  | 28  | 4.66    |
| Superior Temporal gyrus   | L          | -41             | -1  | -17 | 6.63    |
| Inferior Temporal gyrus   | L          | -43             | -7  | -40 | 4.48    |
| Insula                    | L          | -33             | -4  | 17  | 5.62    |
| Insula                    | R          | 38              | -1  | 14  | 5.33    |
| Putamen                   | R          | 26              | 14  | -4  | 5.34    |
| Caudate                   | L          | -9              | 8   | -1  | 4.83    |
| Caudate                   | R          | 15              | 22  | -1  | 4.81    |
| <b>bvFTD-G1</b>           |            |                 |     |     |         |
| Inferior Frontal gyrus    | L          | -38             | 27  | 8   | 6.07    |
| Middle Frontal gyrus      | R          | 30              | 22  | 46  | 5.12    |
| Medial Frontal gyrus      | R          | 8               | -6  | 62  | 4.65    |
| Medial Frontal gyrus      | L          | -1              | 63  | -5  | 4.51    |
| Middle Frontal gyrus      | L          | -29             | 19  | 46  | 4.24    |
| Anterior Cingulate gyrus  | R          | 3               | 18  | 37  | 4.23    |
| Middle Temporal gyrus     | R          | 55              | -22 | -19 | 8.01    |
| Superior Temporal gyrus   | L          | -51             | -4  | -14 | 5.08    |
| Inferior Temporal gyrus   | L          | -57             | -28 | -22 | 4.63    |
| Insula                    | R          | 35              | -4  | 11  | 6.04    |
| Insula                    | L          | -36             | 22  | 3   | 5.48    |
| Putamen                   | R          | 27              | 18  | -4  | 6.07    |
| Putamen                   | L          | -26             | 16  | -4  | 4.41    |
| Caudate                   | R          | 17              | 19  | 0   | 4.34    |
| <b>bvFTD-G2</b>           |            |                 |     |     |         |
| Middle Frontal gyrus      | L          | -28             | 16  | 44  | 5.33    |
| Superior Frontal gyrus    | L          | -30             | 60  | 9   | 5.08    |
| Medial Frontal gyrus      | L          | 0               | 42  | -22 | 5.01    |
| Superior Frontal gyrus    | R          | 14              | 16  | 53  | 4.18    |
| Insula                    | R          | 35              | 26  | -1  | 4.14    |
| Insula                    | L          | -35             | 23  | 3   | 4.12    |

|         |   |     |    |    |      |
|---------|---|-----|----|----|------|
| Putamen | R | 26  | 18 | -3 | 4.49 |
| Caudate | R | 15  | 17 | -3 | 3.73 |
| Putamen | L | -19 | 20 | -7 | 3.42 |

---
