# Supplementary material for: Frontotemporal dementia subtypes based on behavioral inhibition deficits
Source: PubMed Central journal article supplement — Alzheimers Dement (Amst). 2021 Apr 6;13(1):e12178. doi: 10.1002/dad2.12178 (PMC8022767; doi:10.1002/dad2.12178), 2021-04-06

# Ecological setting in the PRISME platform (Paris Brain Institute)

Two video captures of the waiting-room (The Observer XT<sup>®</sup>, Noldus).

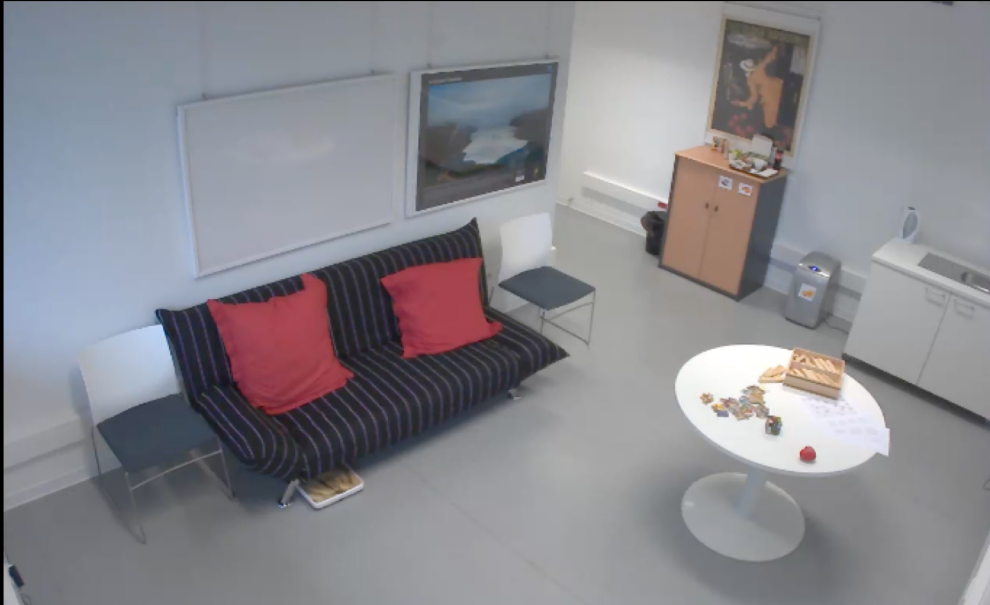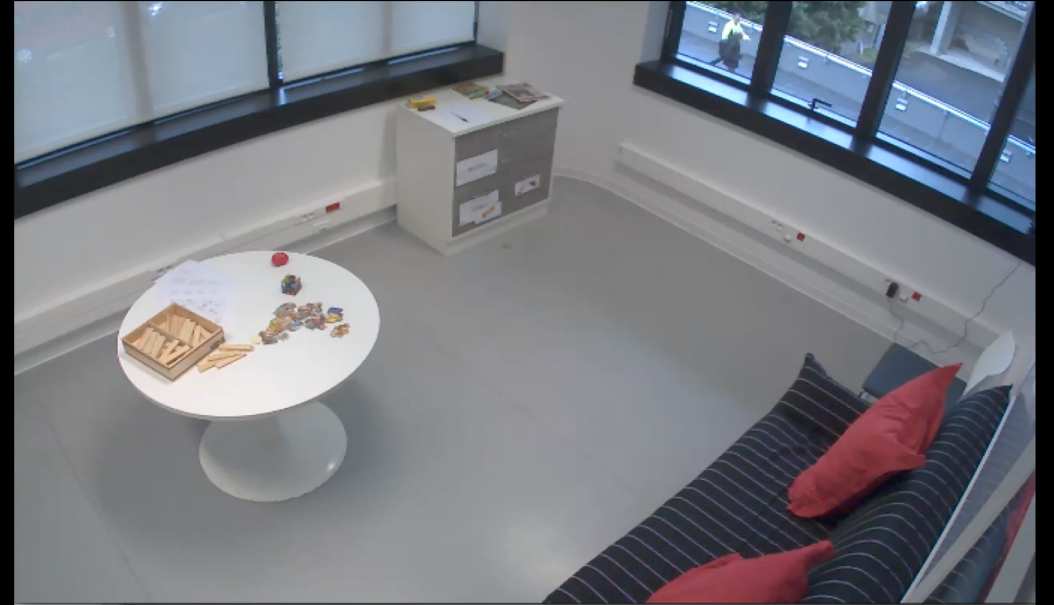

Supplement: DAD2-13-e12178-s003.pdf [file DAD2-13-e12178-s003.pdf]
